# Supplementary material for: The IOC consensus statement: beyond the Female Athlete Triad—Relative Energy Deficiency in Sport (RED-S)
Source: HighWire-hosted journal article supplement (doi:10.1136/bjsports-2014-093502), 2014-03-11
Supplement: bjsports-2014-093502supp.pdf [file bjsports-2014-093502supp.pdf]

**Appendix 1  
RED-S Treatment Contract**

**RED-S Treatment Contract for.....**

**Multidisciplinary Team:**

\_\_\_\_\_ (Physician) \_\_\_\_\_ (Psychotherapist/psychiatrist), \_\_\_\_\_ (Exercise physiologist)  
\_\_\_\_\_ (Dietitian)

**Requirements:**

**Meet with:**

- The therapist as recommended by therapist.
- The dietitian as recommended by dietitian.
- The Dr. as recommended by Dr.
  
- Follow daily meal plan developed by the dietitian.
- Follow the adapted training plan developed by the Exercise physiologist
- If underweight, weight gain expected to be \_\_\_\_\_ lbs per week/weight stable within week....
- If underweight, must achieve minimal acceptable body weight/fat of \_\_\_\_\_ lbs by \_\_\_\_\_
- Weekly weigh-in at the following time intervals of \_\_\_\_\_
- After this date, must maintain weight at or above minimal acceptable body weight.

**If ALL requirements are met and the eating behavior (and other severe conditions) are normalized the Team Dr will decide if cleared for competition.**

**I, \_\_\_\_\_ have read this contract and all of my questions were answered.**

|                            |                                 |             |
|----------------------------|---------------------------------|-------------|
| _____                      | _____                           | _____       |
| <b>Athlete Name</b>        | <b>Athlete Signature</b>        | <b>Date</b> |
| _____                      | _____                           | _____       |
| <b>Team Physician Name</b> | <b>Team Physician Signature</b> | <b>Date</b> |
